# Supplementary material for: Antibody Response to the Sneathia vaginalis Cytopathogenic Toxin A during Pregnancy
Source: PubMed Central journal article supplement — Immunohorizons. 2024 Jan 26;8(1):114–21. doi: 10.4049/immunohorizons.2400001 (PMC10832334; doi:10.4049/immunohorizons.2400001), 2024-01-26
Supplement: IH_2400001_Supplemental_1.pdf [file IH_2400001_Supplemental_1.pdf]

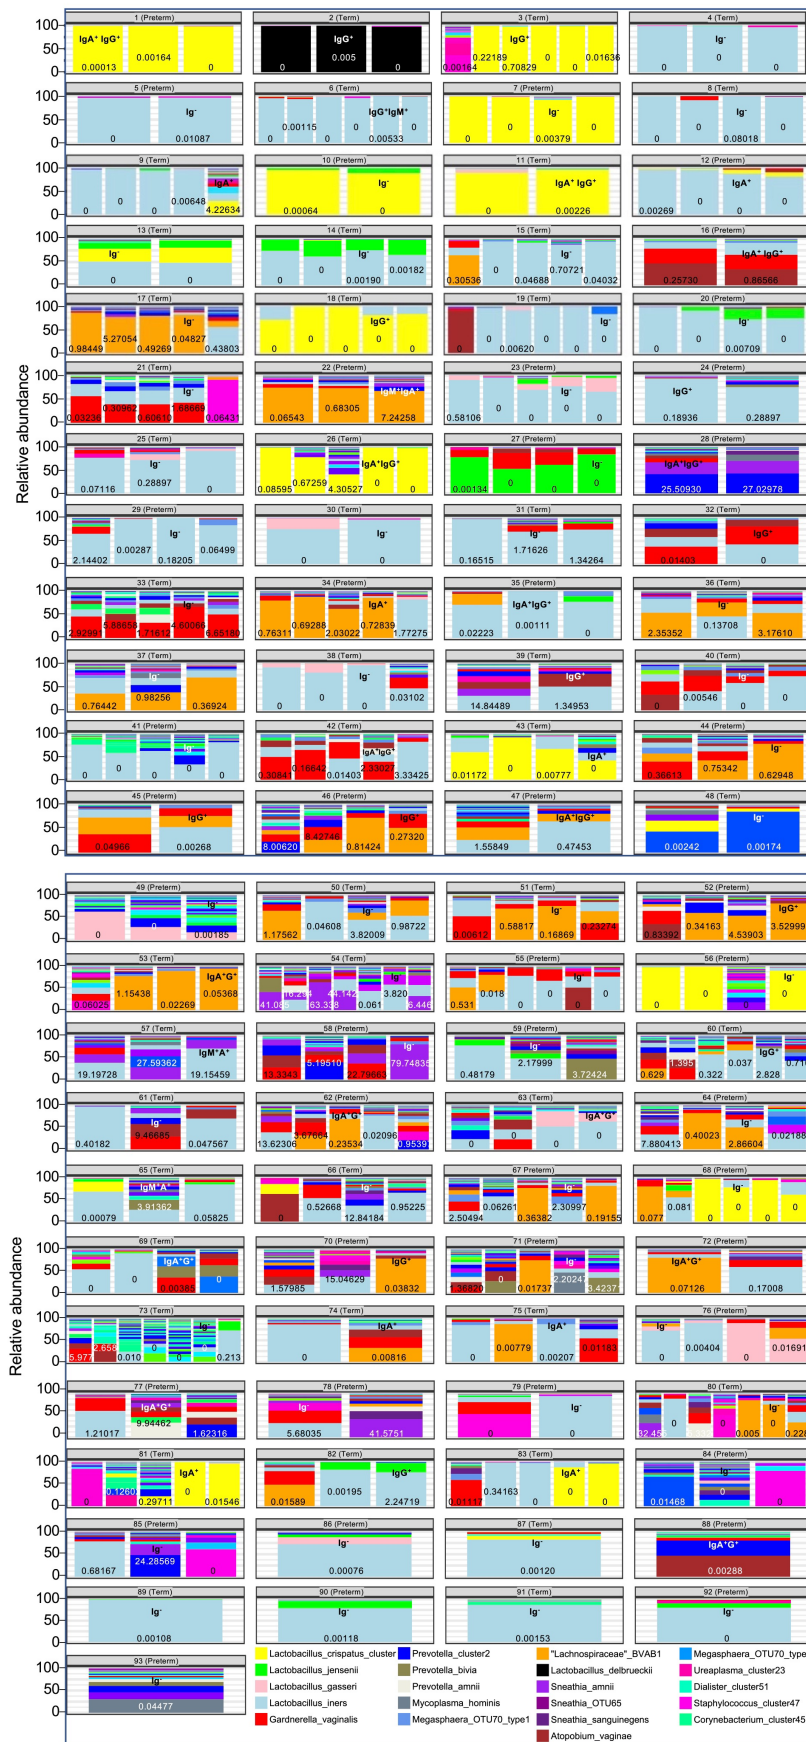

**Supplementary Figure 1.** Microbiome profiles of vaginal swab samples taken at different timepoints during the pregnancies of the 93 subjects included in this study. Profiles were generated by 16S rRNA taxonomic classification. The relative abundance of *Sneathia vaginalis* within each sample is displayed as a percentage on each bar. Presence of IgA, IgG, or IgM or absence of Ig was determined by ELISA at a single timepoint for each participant and the results are displayed on the column for that timepoint. ELISA assays were performed in duplicate and were considered positive if both values were  $\geq 0.05$ . The participant number and whether birth was at term or preterm is shown in the header for each graph.
